# Supplementary material for: Assessing the perceptions of pharmacists working in Lebanese hospitals on the continuing education preferences
Source: PubMed Central journal article supplement — Pharm Pract (Granada). 2018 May 18;16(2):1159. doi: 10.18549/PharmPract.2018.02.1159 (PMC6041213; doi:10.18549/pharmpract.2018.02.1159), 2018-05-18
Supplement: pharmpract-16-1159-suppl.pdf [file pharmpract-16-1159-suppl.pdf]

## Online Appendix. Questionnaire used

### Part 1:

#### 1.1. Hospital location:

Beirut  Mount Lebanon  South Lebanon  North Lebanon  Bekaa  Nabatieh

1.2. Type of hospital:  Public  Private  University

1.3. Number of beds served by the hospital:.....

1.4. Number of ICU/CCU beds served by the hospital:.....

#### 1.6. Is there a specialty unit in your hospital?

Oncology  Transplantation  Burns unit  Psychiatry  Geriatric  Other: \_\_\_\_\_

#### 1.7. Pharmacy opening hours per day

Monday to Friday Number of hours per day : \_\_\_\_\_

Saturday Number of hours per day : \_\_\_\_\_

Sunday Number of hours per day : \_\_\_\_\_

1.8. Is the pharmacy open 24 hours service?  Yes  No

1.9. Is there a pharmacist night shift services in the hospital?  Yes  No

1.10. Is there an on-call pharmacy service?  Yes  No

Chief pharmacist  Assistant pharmacist  Clinical pharmacist  Pharmacy technician

#### 1.11. Is your hospital affiliated to any of the following teaching programs? (ie. routine training site for students, residents, interns, or other trainees?)

University School of Pharmacy  Nursing School  School of medicine

None  Other: \_\_\_\_\_

#### 1.12. Is the Pharmacy Department involved in the training any of these groups?

Undergraduate pharmacists  Pharm.D  Pharmacy support staff

None  Other: \_\_\_\_\_

## Part 2: Pharmacy staff Workforce

**2.1. Pharmacist Gender:**  Number of Females:.....  Number of Males:.....

**2.2. Non-Pharmacy Staff Gender:**  Number of Females:.....  Number of Males:.....

### 2.3. Pharmacist qualifications

|                      | B.S. Pharm | Pharm.D | MS | MBA | MPH | Post-graduate certificate or diploma |
|----------------------|------------|---------|----|-----|-----|--------------------------------------|
| Chief pharmacist     |            |         |    |     |     |                                      |
| Assistant pharmacist |            |         |    |     |     |                                      |
| Oncology pharmacist  |            |         |    |     |     |                                      |
| Research pharmacist  |            |         |    |     |     |                                      |
| Clinical pharmacist  |            |         |    |     |     |                                      |

### 2.3. Non-Pharmacist staff qualifications

|             | Number of Non-Pharmacist staff | Specify |
|-------------|--------------------------------|---------|
| Diploma     |                                |         |
| Certificate |                                |         |
| Other       |                                |         |

### 2.4. Age profile: Number of Pharmacist in the following age range

| Under 35 | 35-44 | 45-54 | 55-64 | 65 and above |
|----------|-------|-------|-------|--------------|
|          |       |       |       |              |

### 2.5. Working schedule

|                  | Pharmacist  | # Years of practice | # Non Pharmacist staff | # Years of practice |
|------------------|-------------|---------------------|------------------------|---------------------|
| <b>Full time</b> | Chief:      |                     |                        |                     |
|                  | Assistants: |                     |                        |                     |
|                  | Clinical:   |                     |                        |                     |
| <b>Part time</b> |             |                     |                        |                     |

### 2.6. Organizational chart: Chief pharmacist reports to:

General director or CEO  Medical director /CMO  Financial director/CFO  Other:.....

## Part 3: System /Services

### 3.1. Which of the following services are under the control of a pharmacist?

|                                                                           |  |                                                                   |  |
|---------------------------------------------------------------------------|--|-------------------------------------------------------------------|--|
| Reviewing medication order                                                |  | Selection, Purchasing and procurement of sterile medical supplies |  |
| Disease prevention and wellness programs (smoking cessation, vaccination) |  | Distribution of sterile medical supplies                          |  |
| Consultation on medication management and uses                            |  | Blood derivatives                                                 |  |
| Restricted Antibiotics and Antimicrobial stewardship                      |  | Investigational drugs                                             |  |
| Medications selection and procurement                                     |  | Purchasing diagnostic tests                                       |  |
| Medication dispensing                                                     |  | Purchasing Medical gases                                          |  |
| Waste management                                                          |  | Purchasing radiopharmaceutical products                           |  |
| IV admixture hazardous medications                                        |  | TPN admixture                                                     |  |
| Compounding IV admixtures                                                 |  | Infection control                                                 |  |
| Pharmacokinetic consultation                                              |  | Patient care rounds                                               |  |
| Pharmacotherapy consults                                                  |  | Enteral nutrition                                                 |  |
| Patient counseling                                                        |  | Other:                                                            |  |

**3.2. Is Pharmacy documenting in the medical record?** Yes No

**3.3. How are medication orders received by the pharmacy department?**

Written physician order sent by fax or scan A copy of a written physician order

Computerized Physician order entry Transcribed physician order by a nurse

**3.4. How are your clinical pharmacy services organized?**

Centralised: pharmacists visit patient care areas at least once daily

Centralised: pharmacists visit patient care areas regularly, but not every day

Decentralised: pharmacists spend at least 50% of their time in patient care areas

Other: .....

Not applicable:.....

**3.5. Are there any pharmacist-led outpatient clinics in your hospital?** Yes

Specify:..... No

**3.6. What standards do you operate to in relation to compounding/IV preparation, if relevant?**

USP 797 USP 800 GMP Other:.....

**3.7. Is there a formulary in place in your hospital?** Yes No In progress

**3.8. If Yes, how often is the formulary updated?** Every year Every two years  > every two years

**3.9. Who is the governing body for formulary management and updates?**

P&T Chief pharmacist General director Other.....

**3.10. Is the pharmacy department team responsible for monitoring formulary compliance?** Yes No

**3.11. Does the hospital have an external quality certification? (e.g. ISO, JCI...)**

Yes Specify:..... No In progress

**3.12. Does your pharmacy issue any of the following educational materials?**

Newsletter, how often: .....

Flyers/Brochures, how often: .....

Guidelines/Charts/Protocols: .....

Other, please specify & how often: .....

**Which ones are for external circulation targeting the public and patients?**

.....

## Part 4: Budget

**4.1. Does the chief pharmacist participate in setting the yearly pharmacy budget?** Yes No

**4.2. Does the pharmacy have a continuing education budget for:**

a) Chief Pharmacist, b) All other pharmacists, c) Pharmacy technicians

## Part 5: Quality management

**5.1. Does the Pharmacy participate in setting the strategic planning of the hospital?** Yes No

**5.2. Does your Pharmacy have a designated Quality champion coordinating between the Pharmacy and the Quality department?**

Yes No

Who?.....

**5.3. Is there an annual Quality Improvement Plan(QIP) targeting the strategic direction and the goals of the hospital?**

Yes

No

**5.4. If yes, does your QIP use SMART objectives and relevant KPIs for continuous improvement of the pharmacy department?**

Yes No

**5.5. How often is your QIP monitored?** .....

## Part 6: Interprofessional relationships

**6.1. Do hospital leaders support the role of pharmacists in patient care?** Yes No Partly

**6.2. Which, of the following multidisciplinary teams or committees include(s) a pharmacist or other representative of the pharmacy department?**

Antimicrobial stewardship P&T Ethics/research Infection control Quality improvement

Health and safety Medication safety Risk management None

Other: \_\_\_\_\_

**6.3. Which of the previously mentioned committees is chaired by chief pharmacist?.....**

**6.4. Is there collaboration between the hospital pharmacy and the attending physician for patients following discharge?** Planned discharge services Nominated community pharmacy None

**6.5. Does the pharmacy perform medication reconciliation?**

upon admission  Upon transfer  Upon discharge  Not applicable

Yes, for all patients  Yes, for high risk patient's  For ER patients

**6.6. Does the pharmacy collaborate with other hospital pharmacies for patient care?**

Yes, occasional  Yes, routinely  No

## Part 7: Technology

**7.1. Which of the following computer support technology is available in your pharmacy department?**

| Computer systems                                                                                                                                 | Available |
|--------------------------------------------------------------------------------------------------------------------------------------------------|-----------|
| Intranet                                                                                                                                         |           |
| Internet                                                                                                                                         |           |
| Online medicines information and resources                                                                                                       |           |
| Integrated clinical decision support tool e.g Drug interaction, Drug information database, Medication errors reporting software, Patient profile |           |

**7.2. Computer technology in your department serves for :**

Receiving and processing physician orders  Billing and invoicing  Stock control and distribution

Interdepartmental Communication  Research and use of databases  Patient follow-up

Screening drug interaction  Patient medication profiling  Drug Information

Dosage calculation  Preparing financial report  Data analysis

Electronic health record  Medication errors reporting reports

Intervention reporting system

## Part 8: Continuing education

|                                                                                                        |                                                                                                                                                                                                                   |
|--------------------------------------------------------------------------------------------------------|-------------------------------------------------------------------------------------------------------------------------------------------------------------------------------------------------------------------|
| The value that your employer places on your participation in continuing education                      | No interest      High Interest<br>1 2 3 4 5                                                                                                                                                                       |
| Your interest in/value of continuing education                                                         | No interest      High Interest<br>1 2 3 4 5                                                                                                                                                                       |
| Continuing education affects the way you practice                                                      | Strongly disagree      Strongly Agree<br>1 2 3 4 5                                                                                                                                                                |
| Continuing education helps increase your knowledge                                                     | Strongly disagree      Strongly Agree<br>1 2 3 4 5                                                                                                                                                                |
| Please indicate any certifications for specialty practice or disease management that you have obtained | Answer:                                                                                                                                                                                                           |
| Are you practicing in the discipline of your certification?                                            | Yes      No                                                                                                                                                                                                       |
| Do you belong to any professional organizations?                                                       | Yes      No                                                                                                                                                                                                       |
| What type of continuing education have you used in the past?                                           | Live in-person DVD/Video/audio<br>Computer/Internet based<br>Printed materials<br>Interactive workshop<br>Journals      Webinar<br>Textbooks/reference books<br>Medical search engines<br>Others :please specify: |
| What type of continuing education would you prefer to use in the future?                               | Live in-person DVD/Video/audio<br>Computer/Internet based<br>Printed CE materials<br>Interactive workshop<br>Journals<br>Textbooks/reference books<br>Medical search engines<br>Others : please specify:          |

### 8.1. Please rate why you used the types of CE indicated above:

|                                                                       |                                                    |
|-----------------------------------------------------------------------|----------------------------------------------------|
| Low or no cost                                                        | Strongly disagree      Strongly agree<br>1 2 3 4 5 |
| Interested in /motivated to learn about topic regardless of the venue | Strongly disagree      Strongly agree<br>1 2 3 4 5 |
| Networking and socializing opportunities                              | Strongly disagree      Strongly agree<br>1 2 3 4 5 |
| Offered during a conference or event already attending                | Strongly disagree      Strongly agree<br>1 2 3 4 5 |
| Effective advertising                                                 | Strongly disagree      Strongly agree<br>1 2 3 4 5 |
| Easily accessed print or online material                              | Strongly disagree      Strongly agree<br>1 2 3 4 5 |

### 8.2. Rate your level of satisfaction with the types of CE you have participated in

|                                      |                                                      |
|--------------------------------------|------------------------------------------------------|
| Live in-person                       | Highly dissatisfied    Highly satisfied<br>1 2 3 4 5 |
| Computer/Internet based              | Highly dissatisfied    Highly satisfied<br>1 2 3 4 5 |
| Interactive workshop                 | Highly dissatisfied    Highly satisfied<br>1 2 3 4 5 |
| DVD/Video/audio                      | Highly dissatisfied    Highly satisfied<br>1 2 3 4 5 |
| Printed materials                    | Highly dissatisfied    Highly satisfied<br>1 2 3 4 5 |
| Journals publications                | Highly dissatisfied    Highly satisfied<br>1 2 3 4 5 |
| Medical search engines               | Highly dissatisfied    Highly satisfied<br>1 2 3 4 5 |
| Authorship textbooks/reference books | Highly dissatisfied    Highly satisfied<br>1 2 3 4 5 |

### 8.3. What are the reasons that prevent (or has prevented) you from attending live CE?

- Cost     Timing of talk     Family commitment             Work responsibilities  
 Interest in the topic     Easier to receive print/electronic material  
 Distance Travel             Others:.....

### 8.4. Rate your level of interest in continuing education that covers

|                                   |                                           |
|-----------------------------------|-------------------------------------------|
| Innovations in disease management | No interest    High interest<br>1 2 3 4 5 |
| Humanities or psychology topic    | No interest    High interest<br>1 2 3 4 5 |
| Innovations in Pharmacy practice  | No interest    High interest<br>1 2 3 4 5 |
| Innovations in drug press         | No interest    High interest<br>1 2 3 4 5 |
| Results in skill development      | No interest    High interest<br>1 2 3 4 5 |
| Pharmacy management concepts      | No interest    High interest<br>1 2 3 4 5 |

Do you have any suggestion for further CE subjects: (Please specify):
